# Supplementary material for: One step hydrothermal synthesis of CeO2–ZrO2 nanocomposites and investigation of the morphological evolution
Source: Royal Society of Chemistry journal article supplement (doi:10.1039/c5ra19271d), 2015-01-01
Supplement: c5ra19271d1.pdf [file c5ra19271d1.pdf]

# One Step Hydrothermal Synthesis of CeO<sub>2</sub>-ZrO<sub>2</sub> Nanocomposites and Investigation of the Morphological Evolution

Xiaohui Zhang<sup>a,b</sup>, Qiang Wang<sup>a,b,\*</sup>, Jing Zhang<sup>a,b</sup>, Jigang Wang<sup>a,b</sup>, Ming Guo<sup>a,c</sup>,  
Shaowei Chen<sup>c,\*</sup>, Chunhong Li<sup>d</sup>, Changwen Hu<sup>e</sup> and Youchang Xie<sup>f</sup>

## Supporting information

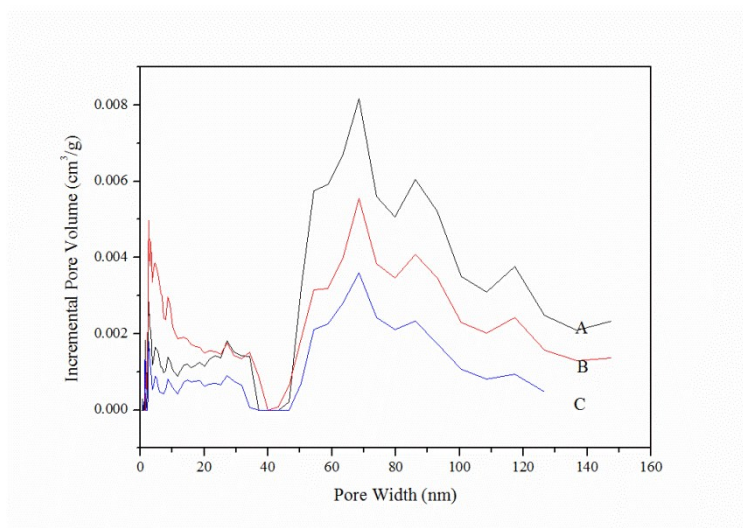

Fig. S1 The pore size distribution: Ce<sub>0.9</sub>Zr<sub>0.1</sub>O<sub>2</sub> hydrothermal treated at 373K for A: 10 h, B: 24 h, C: 48 h then calcined at 673K.

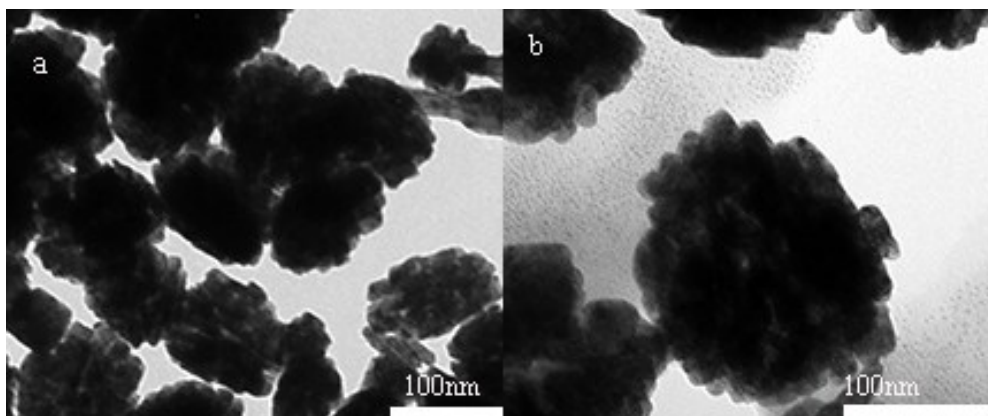

Fig. S2 CeO<sub>2</sub> hydrothermal treated at 373K for 48 h then calcined at 673K.

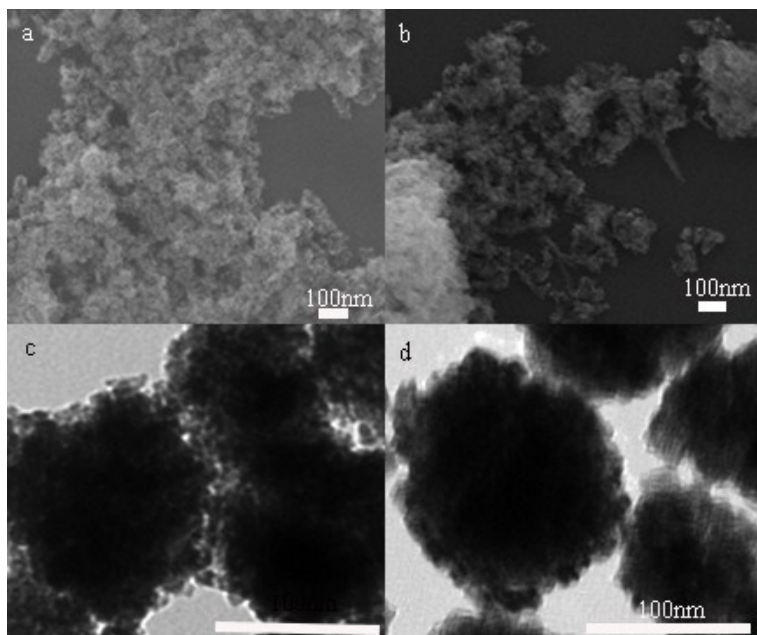

Fig. S3 The molar ratio of urea to precursor was 30:1 after hydrothermal treated at 373K for (a) 4 h, (b)8 h, (c)10 h, (d) 15 h.

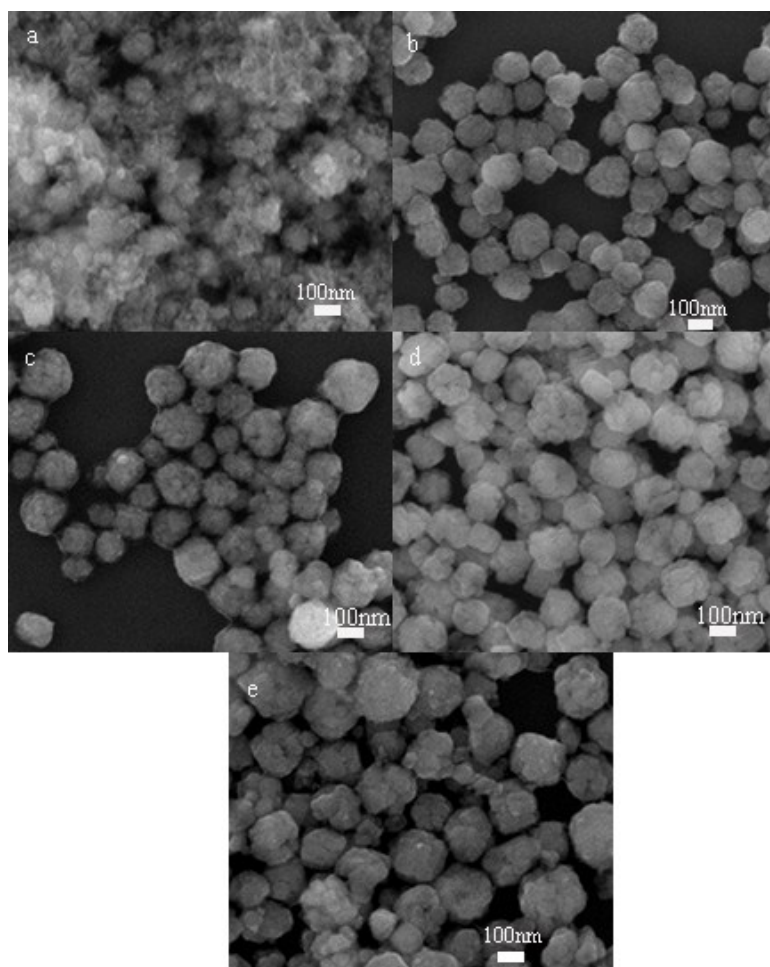

Fig. S4 The molar ratio of urea to precursor was 40:1 and hydrothermal treated at (a) 393K, (b) 413K, (c) 433K, (d) 453K, (e) 473K for 4 h.

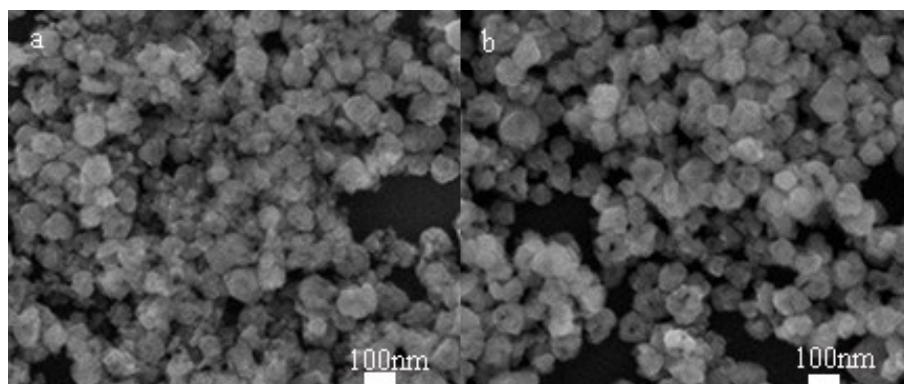

Fig. S5 SEM images of  $\text{Ce}_{0.9}\text{Zr}_{0.1}\text{O}_2$  calcined at 1173K with the molar ratio of urea to precursor was 40:1 and hydrothermal treated for (a) 10 h, (b) 48 h.

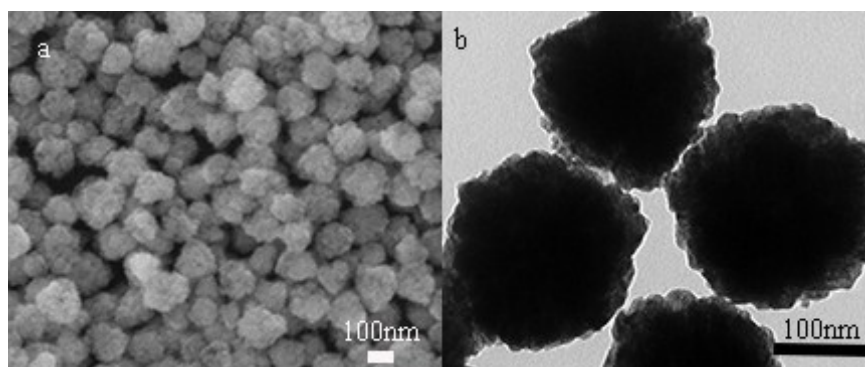

Fig. S6 (a) SEM images of  $\text{Ce}_{0.75}\text{Zr}_{0.25}\text{O}_2$  synthesized at 373K of 48h and calcined at 773K; (b) TEM images of  $\text{Ce}_{0.75}\text{Zr}_{0.25}\text{O}_2$  synthesized at 373K, 48 h and calcined at 773K.

Briefly, 0.2 g of  $\text{CeO}_2$  and  $\text{Ce}_{0.9}\text{Zr}_{0.1}\text{O}_2$  were first added into the calculated amount of GO ( 8wt%) solution followed by ultrasonic dispersion for 30 min and vigorous stirring for another 2 h to disperse  $\text{CeO}_2$  and  $\text{Ce}_{0.9}\text{Zr}_{0.1}\text{O}_2$  sufficiently. Then, the mixing solution was transferred into a 100 ml Teflon-sealed autoclave at 423K for 5 h and cooled down to room temperature naturally. The resulting hybrids were recovered by centrifugation, washed with water and alcohol several times, and fully dried in air

at 333K.
